# Supplementary material for: Synthesis of fluorescent polystyrene nanoparticles: a reproducible and scalable method
Source: PeerJ journal article supplement (doi:10.7717/peerj-matsci.22), 2022-05-10
Supplement: SI.pdf [file SI.pdf]

# **Synthesis of Fluorescent Polystyrene Nanoparticles: A Reproducible and Scalable Method**

Dávid Bartoš, Lu Wang\*, Andy S. Anker, Morten Rewers, Olivia Aalling-Frederiksen, Kirsten M. Ø. Jensen, and Thomas Just Sørensen\*

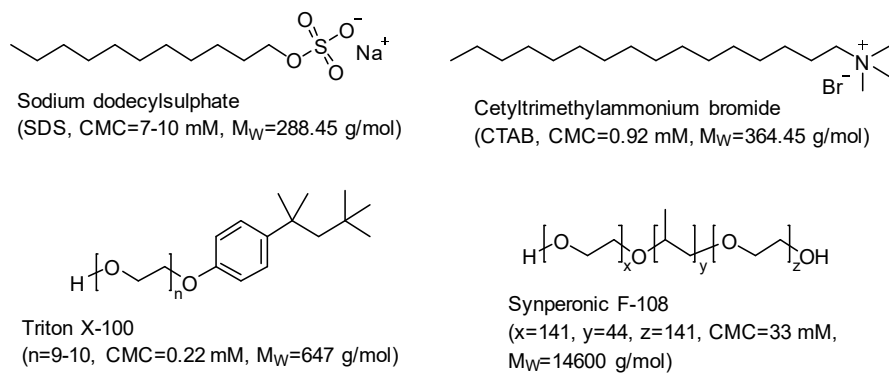

**Scheme S1.** Information of the surfactants used to make PS NPs.

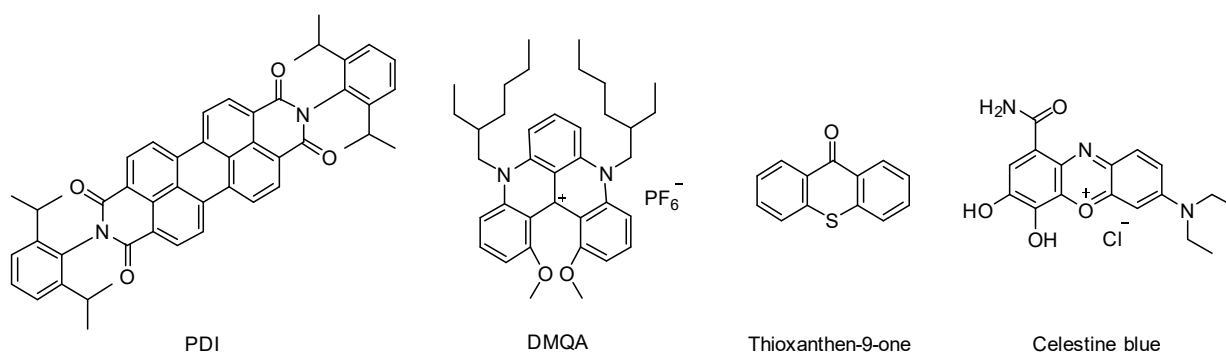

**Scheme S2.** Structures of the model hydrophobic dyes incorporated into the PS NPs.

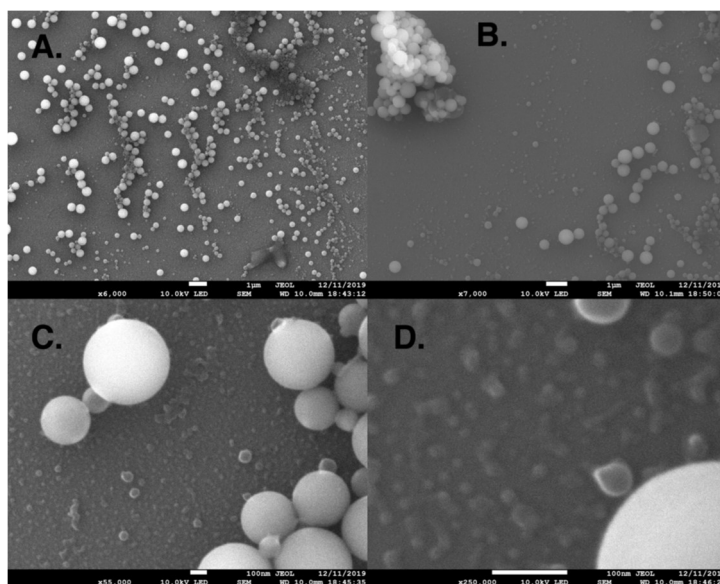

**Figure S1.** SEM images of PDI loaded PS NPs with SDS concentration of 0.001 mg/ml at different magnification levels (scale bar, AB, 1 $\mu$ m; CD, 100 nm).

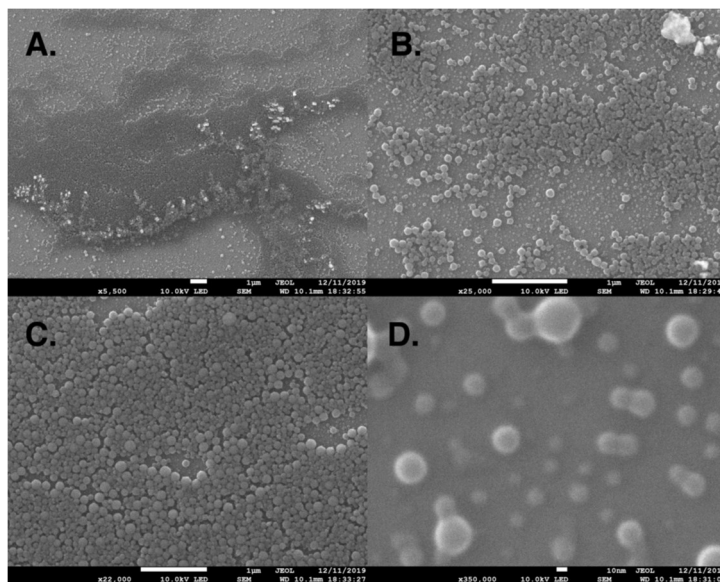

**Figure S2.** SEM images of PDI loaded PS NPs with SDS concentration of 0.5 mg/ml at different magnification levels (scale bar, ABC, 1μm; D, 10 nm)

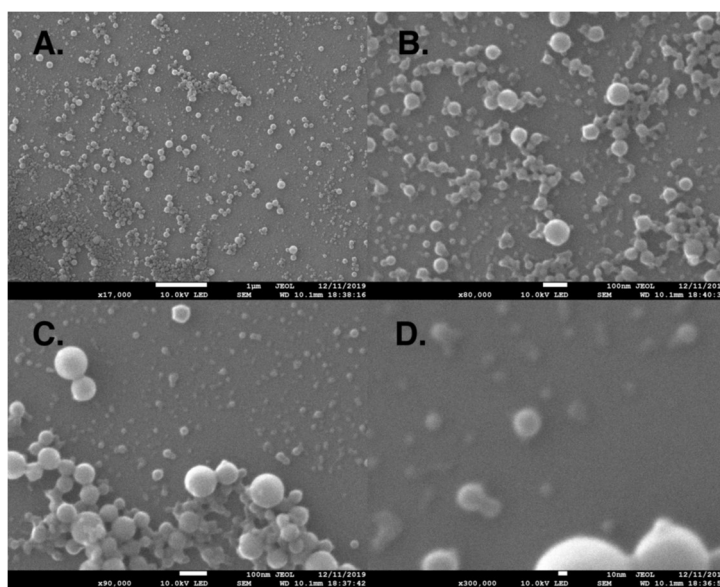

**Figure S3.** SEM images of PDI loaded PS NPs with SDS concentration of 1 mg/ml at different magnification levels (scale bar, A, 1μm; BC, 100 nm; D, 10nm).

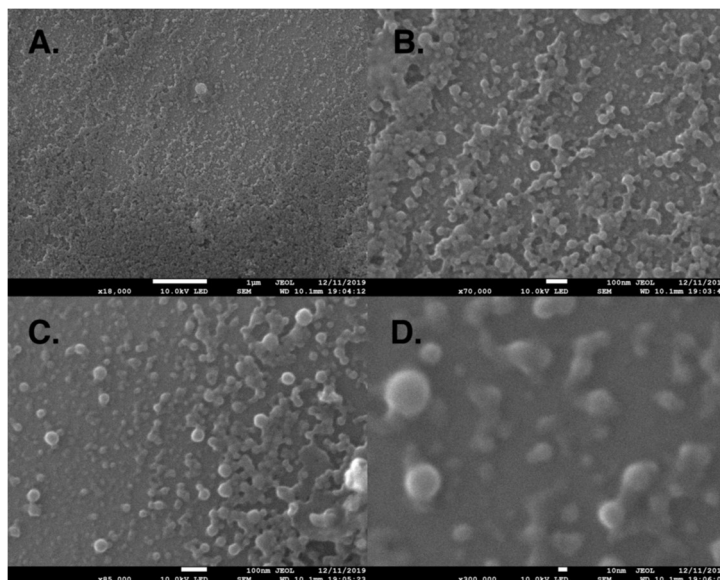

**Figure S4.** SEM images of PDI loaded PS NPs with SDS concentration of 20 mg/ml at different magnification levels (scale bar, A, 1 $\mu$ m; BC, 100 nm; D, 10nm).

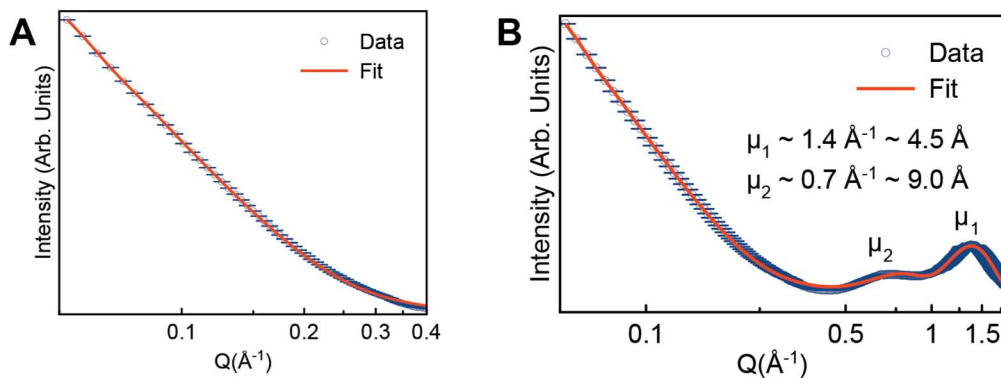

**Figure S5.** A) The fit with a spherical SAXS form factor using a lognormal polydispersity and a power law in the Q-range = [0.05; 0.4] with a radius of  $r = 10.75$  nm ( $\mu = 10.75 \pm 0.13$  nm and  $\sigma = 0.1489 \pm 0.0024$  nm). B) The fit in the higher Q-regime with 2 peaks present representing frequent distances in the structure. These can be fitted with 2 Gaussian distributions with mean of approx. 0.7 and 1.4  $\text{\AA}^{-1}$  which correspond to distances in the structure of 4.5  $\text{\AA}$  and 9.0  $\text{\AA}$ .

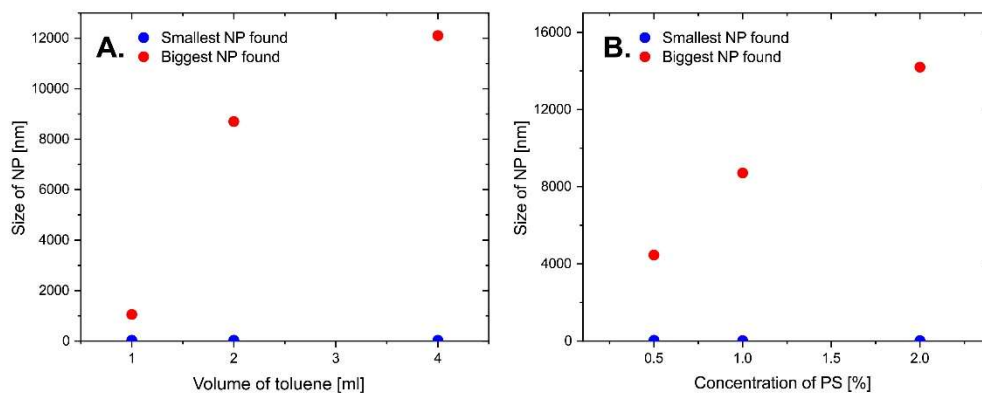

**Figure S6.** Largest and smallest NPs sizes as functions of using various amounts of A) toluene and B) polystyrene. PS NPs were prepared according to the standard protocol with the surfactant Triton X-100 (1.08 mg/ml) in 14 mL of water and 17.3 mg of PS (Mw 35,000) in corresponding volume of toluene for A or PS (Mw 35,000) 0.5%, 1%, 2% w/w% in 2 mL of toluene for B.

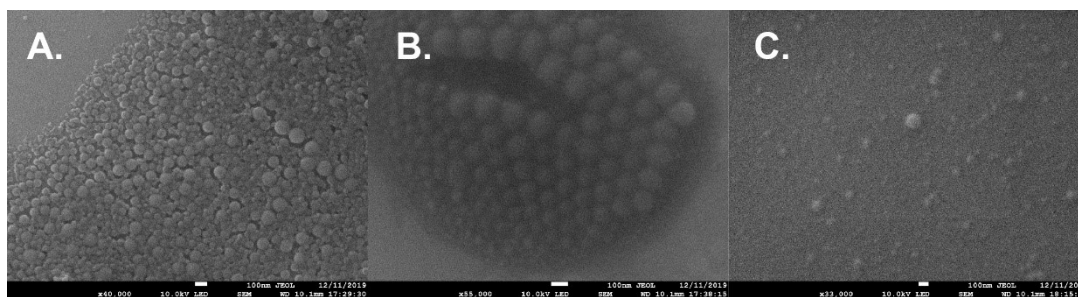

**Figure S7.** SEM images for the PS NPs prepared with surfactants A) CTAB, B) Triton X-100, and C) Synperonic F-108 with concentration of 1.73 mM (scale bar, 100 nm).

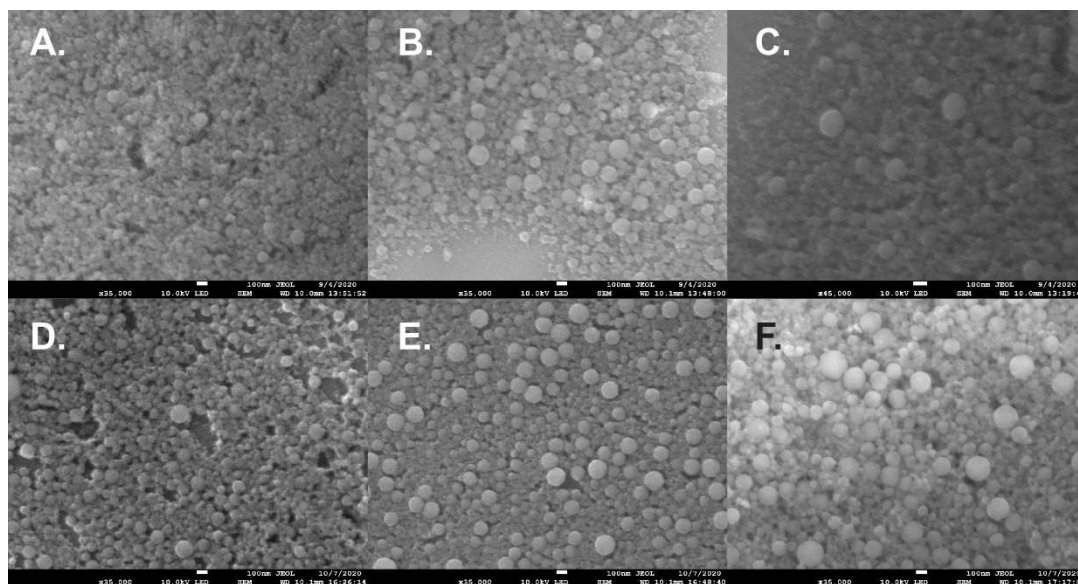

**Figure S8.** SEM images for the PS NPs prepared with PS with molecular weight AD) 35,000, BE) 280,000, and CF) 350,000 (scale bar, 100 nm).

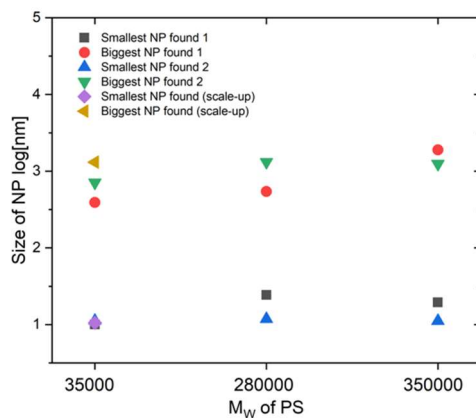

**Figure S9.** The biggest and the smallest PS NPs observed with SEM for PS NPs prepared with PS with molecular weight 35,000, 280,000, and 350,000, and 2 batches for each. The biggest and the smallest PS NPs for the 5 times scale-up sample was also shown here with yellow and purple markers.

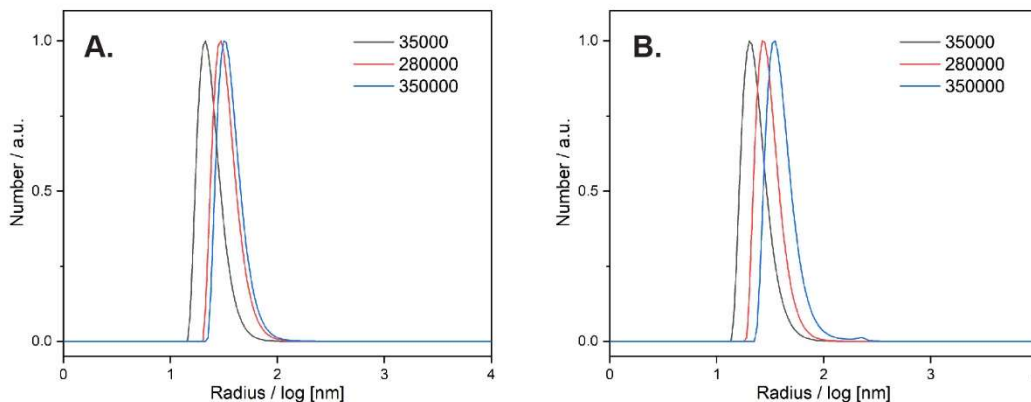

**Figure S10.** DLS results for the size distribution for the PS NPs prepared with different PSs (Mw 35,000, 280,000, 350,000). PS NPs were prepared according to the standard protocol with PS 1% in 2 mL toluene and 1 mg/mL SDS in 14 mL water. The mean position of peaks are respectively 23.96, 33.75 and 36.90 nm for one batches A) and another batches B) 23.53, 31.19, 40.61 nm

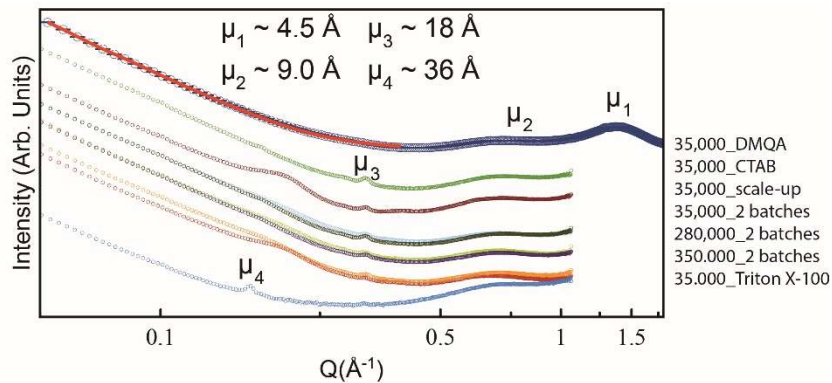

**Figure S11.** SAXS results for different batches of PS NPs as labeled to the right.

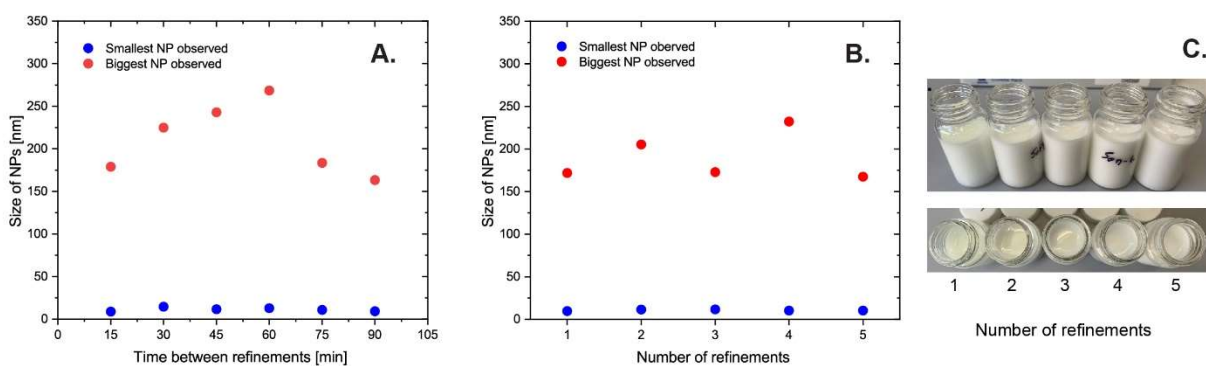

**Figure S12.** The largest and the smallest PS NPs observed with SEM for samples prepared with the same amount of each ingredient (PS Mw, 35,000 1% in 2 mL toluene and 0.1 mg/mL SDS in 14 mL water) but with different A) durations between refinements or B) number of refinements. C) Photos of the PS NPs solution obtained after different refinement cycles.

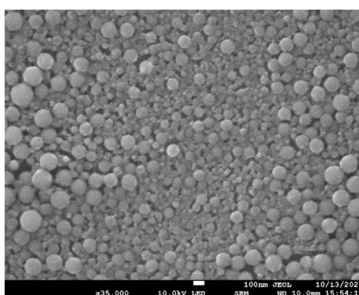

**Figure S13.** SEM image for the 5 times scale-up PS NPs batch (PS Mw, 35,000 1% in 10 mL toluene; 0.1 mg/mL SDS in 70 mL water; with standard refinement method).

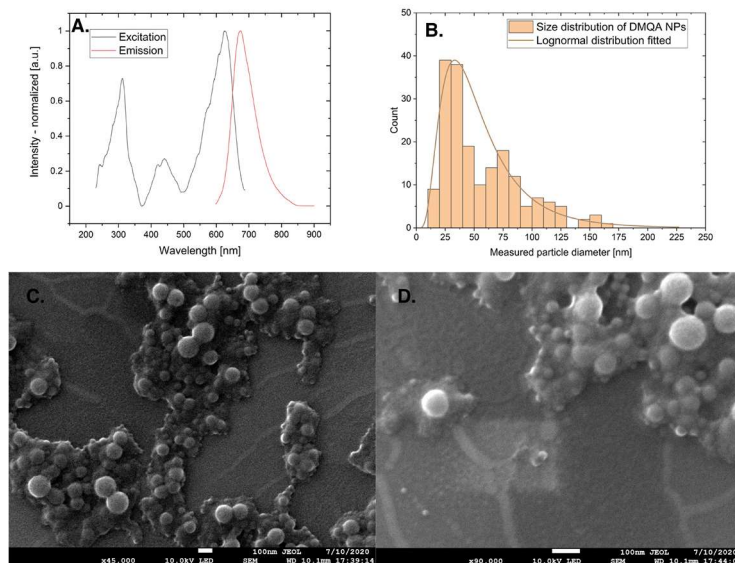

**Figure S14.** A) Excitation and emission spectra (normalized at Ex. 635 nm and Em. 692 nm), B) size distribution counted from SEM image C (n=187, bin size 10 nm) and CD) SEM images for PS NPs loaded with DMQA.

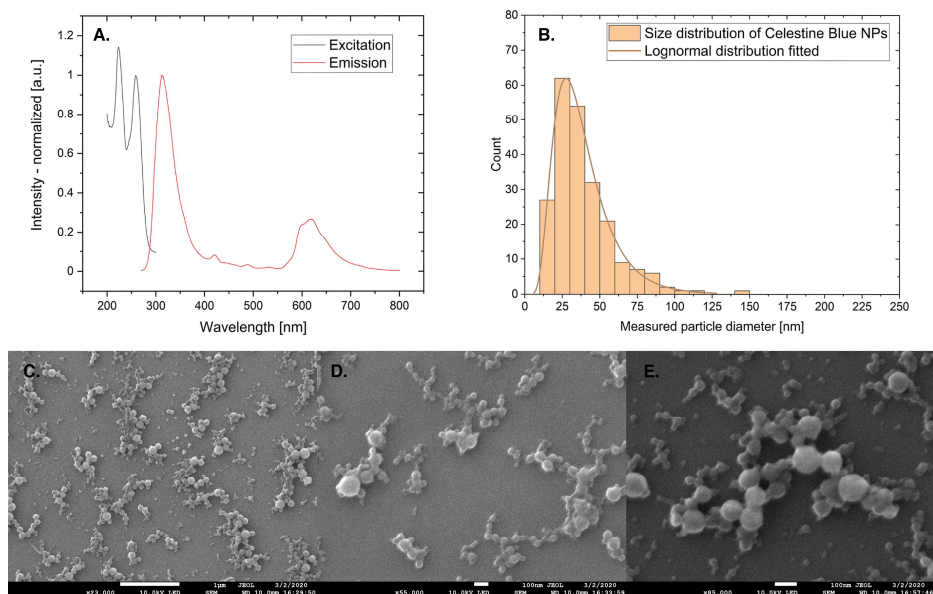

**Figure S15.** A) Excitation and emission spectra (normalized at Ex. 265 nm and Em. 322 nm), B) size distribution counted from the SEM image D (n=225, bin size 10 nm) and CDE) SEM images for PS NPs loaded with celestine blue.
